# Supplementary material for: Design of a Digital Comic Creator (It’s Me) to Facilitate Social Skills Training for Children With Autism Spectrum Disorder: Design Research Approach
Source: PubMed Central journal article supplement (PMC7382019; doi:10.2196/17260), 2020-07-10
Supplement: mental_v7i7e17260_app1.pdf [file mental_v7i7e17260_app1.pdf]

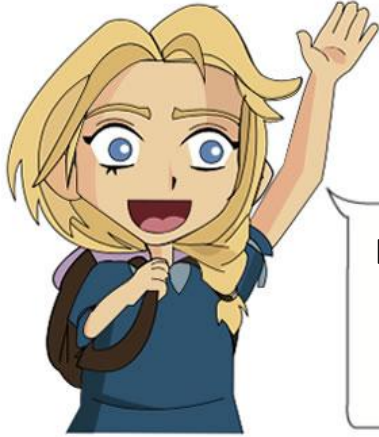

Hallo, dit is de strip van:

Jane

# MIJN STRIP

De ongelooflijke basisschool

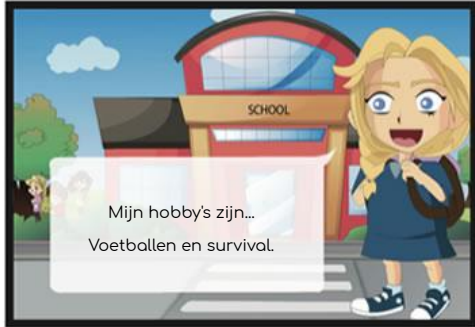

Mijn hobby's zijn...  
Voetballen en survival.

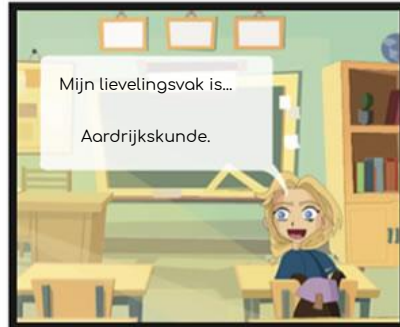

Mijn lievelingsvak is...  
Aardrijkskunde.

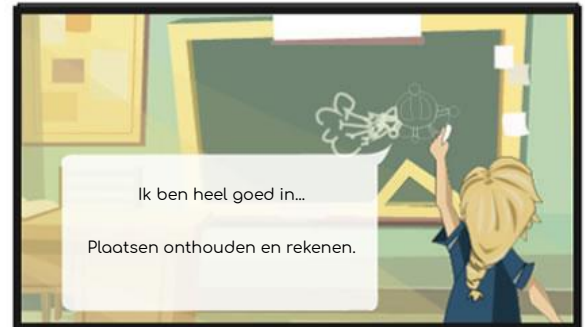

Ik ben heel goed in...  
Plaatsen onthouden en rekenen.

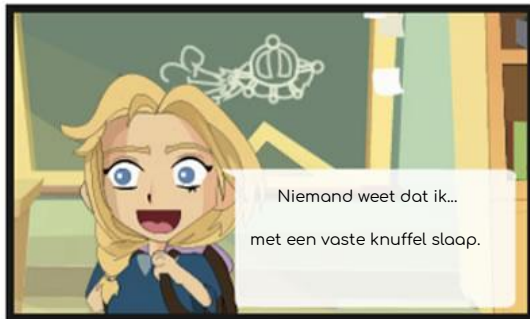

Niemand weet dat ik...  
met een vaste knuffel slaap.

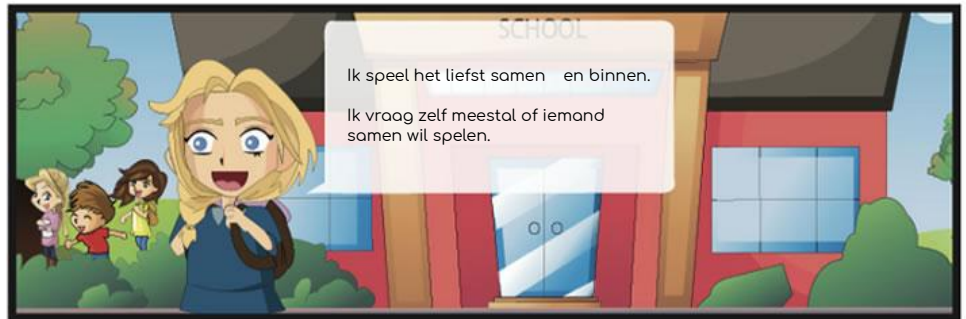

Ik speel het liefst samen en binnen.  
Ik vraag zelf meestal of iemand  
samen wil spelen.

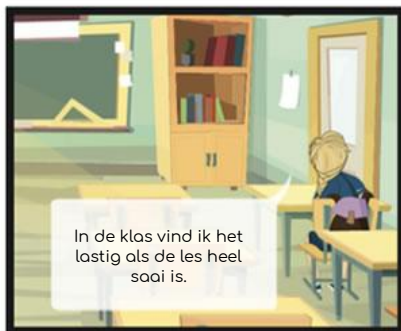

In de klas vind ik het  
lastig als de les heel  
soai is.

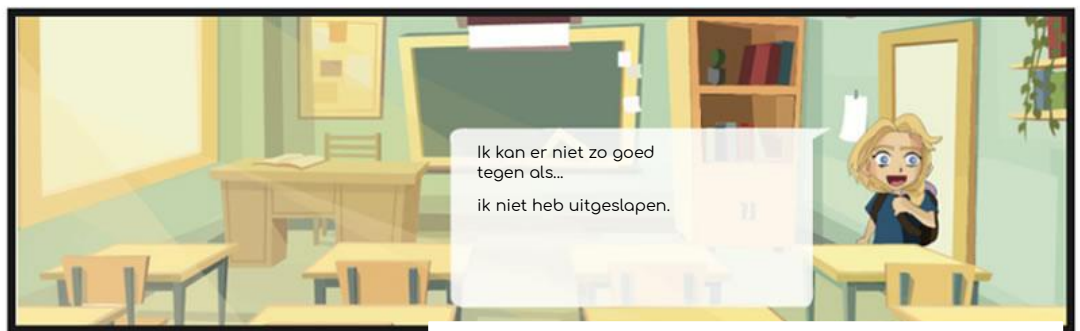

Ik kan er niet zo goed  
tegen als...  
ik niet heb uitgeslapen.

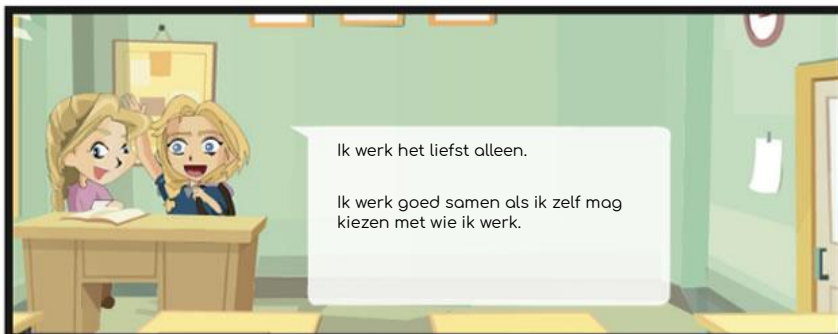

Ik werk het liefst alleen.  
Ik werk goed samen als ik zelf mag  
kiezen met wie ik werk.

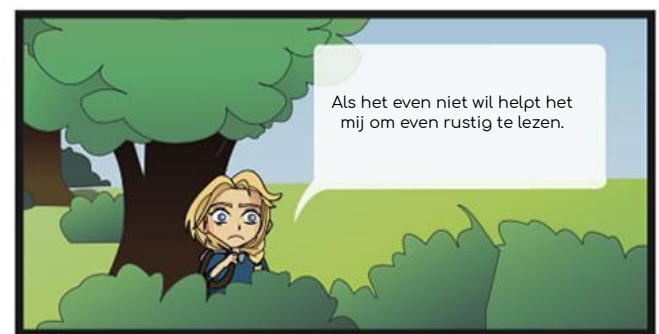

Als het even niet wil helpt het  
mij om even rustig te lezen.

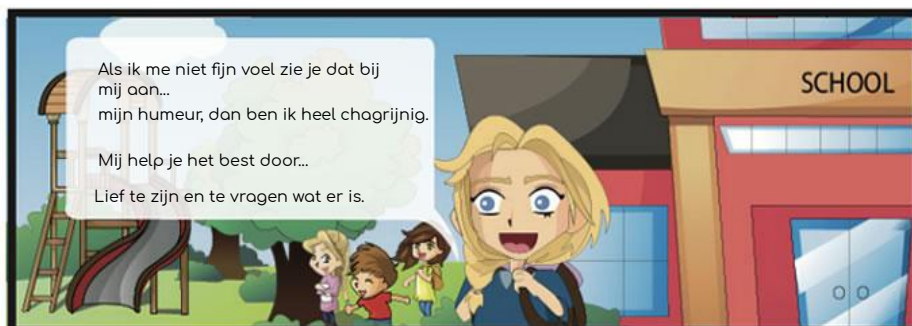

Als ik me niet fijn voel zie je dat bij  
mij aan...  
mijn humeur, dan ben ik heel chagrijnig.  
Mijn help je het best door...  
Lief te zijn en te vragen wat er is.

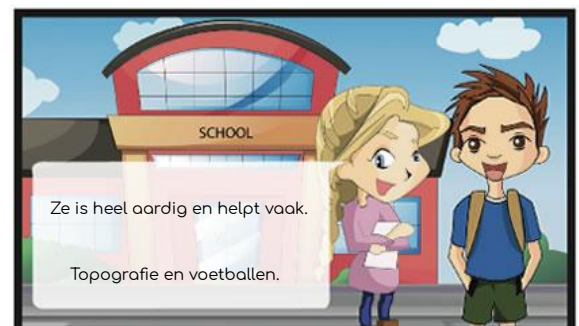

Ze is heel aardig en helpt vaak.  
Topografie en voetballen.
